# Supplementary material
Source: ML conference proceedings conference paper supplement (https://openreview.net/forum?id=01LMSeReNvY)
Supplement: supplementary_material [file attachment]

## Step 0: Prompt Generation

### Prompt Set $\mathcal{Q}$

[Input] A [Mask] film.

[Input] A truly [Mask] movie.

[Input] It's [Mask].

## Step 1: Weak Learner Construction

### Weak Learner $t$

Verbalizer  $M$  🔥

min

Weighted  
Loss  $\mathcal{L}_t$

LM  $F^*(\cdot)$  ❄️

Input

Prompt ❄️

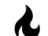

Tuned

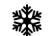

Frozen

Random Draw

## Step 2: Ensemble

ADABOOST  
Ensemble

Final  
Black-Box  
Classifier
